# Supplementary material for: Crystal polymorphism and crystalline-state photochromism of a rhodium dithionite complex with n-methoxypropyl moieties
Source: Royal Society of Chemistry journal article supplement (doi:10.1039/d1ce01613j), 2022-01-01
Supplement: d1ce01613j1.pdf [file d1ce01613j1.pdf]

## Electronic Supplementary Information (ESI) – Table of Contents

# Crystal polymorphism and crystalline-state photochromism of a rhodium dithionite complex with *n*-methoxypropyl moieties

Yuu Kajiwara and Hidetaka Nakai\*

*Department of Applied Chemistry, Faculty of Science and Engineering, Kindai University,  
3-4-1 Kowakae, Higashi-Osaka 577-8502, Japan*

### Tables

|                                                                                            |     |
|--------------------------------------------------------------------------------------------|-----|
| <b>Table S1</b> Percentage populations of the isomers in the crystals of samples 1-7 ..... | S 2 |
|--------------------------------------------------------------------------------------------|-----|

### Figures

|                                                                                                                          |     |
|--------------------------------------------------------------------------------------------------------------------------|-----|
| <b>Fig. S1</b> Changes in the unit cell parameters with (a) irradiation and (b) heating time .....                       | S 3 |
| <b>Fig. S2</b> Cavities in the crystal of <b>2</b> <sup>MPro</sup> (sample 4) .....                                      | S 4 |
| <b>Fig. S3</b> Cavities in the crystal of <b>1</b> <sup>MPro</sup> (sample 1) .....                                      | S 5 |
| <b>Fig. S4</b> ORTEP drawings of <b>1</b> <sup>MPro</sup> in samples of the $\beta$ -crystal and $\alpha$ -crystal ..... | S 6 |

## Tables

**Table S1** Percentage population of the isomers, **1**<sup>MPro</sup> and **2a–d**<sup>MPro</sup>, in the  $\beta$ -crystal<sup>(a)</sup>

|          | <b>1</b> <sup>MPro</sup> | 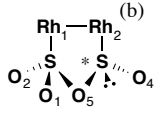 |  |  |  | <b>2</b> <sup>MPro</sup><br>(total) |
|----------|--------------------------|-----------------------------------------------------------------------------------|-----------------------------------------------------------------------------------|------------------------------------------------------------------------------------|-------------------------------------------------------------------------------------|-------------------------------------|
|          |                          | <b>2a</b> <sup>MPro</sup> (R)                                                     | <b>2b</b> <sup>MPro</sup> (R)                                                     | <b>2c</b> <sup>MPro</sup> (S)                                                      | <b>2d</b> <sup>MPro</sup> (S)                                                       |                                     |
| Sample 1 | 100                      | 0                                                                                 | 0                                                                                 | 0                                                                                  | 0                                                                                   | 0                                   |
| Sample 2 | 35                       | 24                                                                                | 41                                                                                | 0                                                                                  | 0                                                                                   | 65                                  |
| Sample 3 | 16                       | 31                                                                                | 53                                                                                | 0                                                                                  | 0                                                                                   | 84                                  |
| Sample 4 | 5                        | 21                                                                                | 74                                                                                | 0                                                                                  | 0                                                                                   | 95                                  |
| Sample 5 | 31                       | 14                                                                                | 55                                                                                | 0                                                                                  | 0                                                                                   | 69                                  |
| Sample 6 | 79                       | 0                                                                                 | 21                                                                                | 0                                                                                  | 0                                                                                   | 21                                  |
| Sample 7 | 100                      | 0                                                                                 | 0                                                                                 | 0                                                                                  | 0                                                                                   | 0                                   |

(a) All the data, except for the data of sample 1 and 7, have  $\pm 4\%$  errors based on the errors of the experimental occupancy factors of the oxygen atoms. Although the crystal has mirror images of **2a–d**<sup>MPro</sup>, as a set, only one mirror image in the crystal is considered in this treatment (*Angew. Chem., Int. Ed.*, 2006, **45**, 6473; *J. Am. Chem. Soc.*, 2008, **130**, 17836). (b) The four stereoisomers, **2a–d**<sup>MPro</sup>, concerned with the  $\mu$ -O<sub>2</sub>SOSO unit. The Cp<sup>MPro</sup> and  $\mu$ -CH<sub>2</sub> ligands are omitted for clarity. The absolute configurations of the sulfur atoms are shown in parentheses.

The values of % for stereoisomers **2a–d**<sup>MPro</sup> were calculated from the simultaneous equations based on the occupancy of the oxygen atoms determined by X-ray diffraction analysis. In the case of sample 2, the equations were as follows:

$$1.00 \text{ (occupancy of O}_1\text{)} = \mathbf{2a}^{\text{MPro}} + \mathbf{2b}^{\text{MPro}} + \mathbf{2c}^{\text{MPro}} + \mathbf{1}^{\text{MPro}}$$

$$0.59 \text{ (occupancy of O}_2\text{)} = \mathbf{2a}^{\text{MPro}} + \mathbf{2c}^{\text{MPro}} + \mathbf{2d}^{\text{MPro}} + \mathbf{1}^{\text{MPro}}$$

$$0.76 \text{ (occupancy of O}_3\text{)} = \mathbf{2b}^{\text{MPro}} + \mathbf{2c}^{\text{MPro}} + \mathbf{2d}^{\text{MPro}} + \mathbf{1}^{\text{MPro}}$$

$$1.00 \text{ (occupancy of O}_4\text{)} = \mathbf{2a}^{\text{MPro}} + \mathbf{2b}^{\text{MPro}} + \mathbf{2d}^{\text{MPro}} + \mathbf{1}^{\text{MPro}}$$

$$0.24 \text{ (occupancy of O}_5\text{)} = \mathbf{2a}^{\text{MPro}} + \mathbf{2d}^{\text{MPro}}$$

$$0.41 \text{ (occupancy of O}_6\text{)} = \mathbf{2b}^{\text{MPro}} + \mathbf{2c}^{\text{MPro}}$$

$$\mathbf{2a}^{\text{MPro}} = 0.240, \mathbf{2b}^{\text{MPro}} = 0.410, \mathbf{2c}^{\text{MPro}} = 0.000, \mathbf{2d}^{\text{MPro}} = 0.000, \mathbf{1}^{\text{MPro}} = 0.350.$$

## Figures

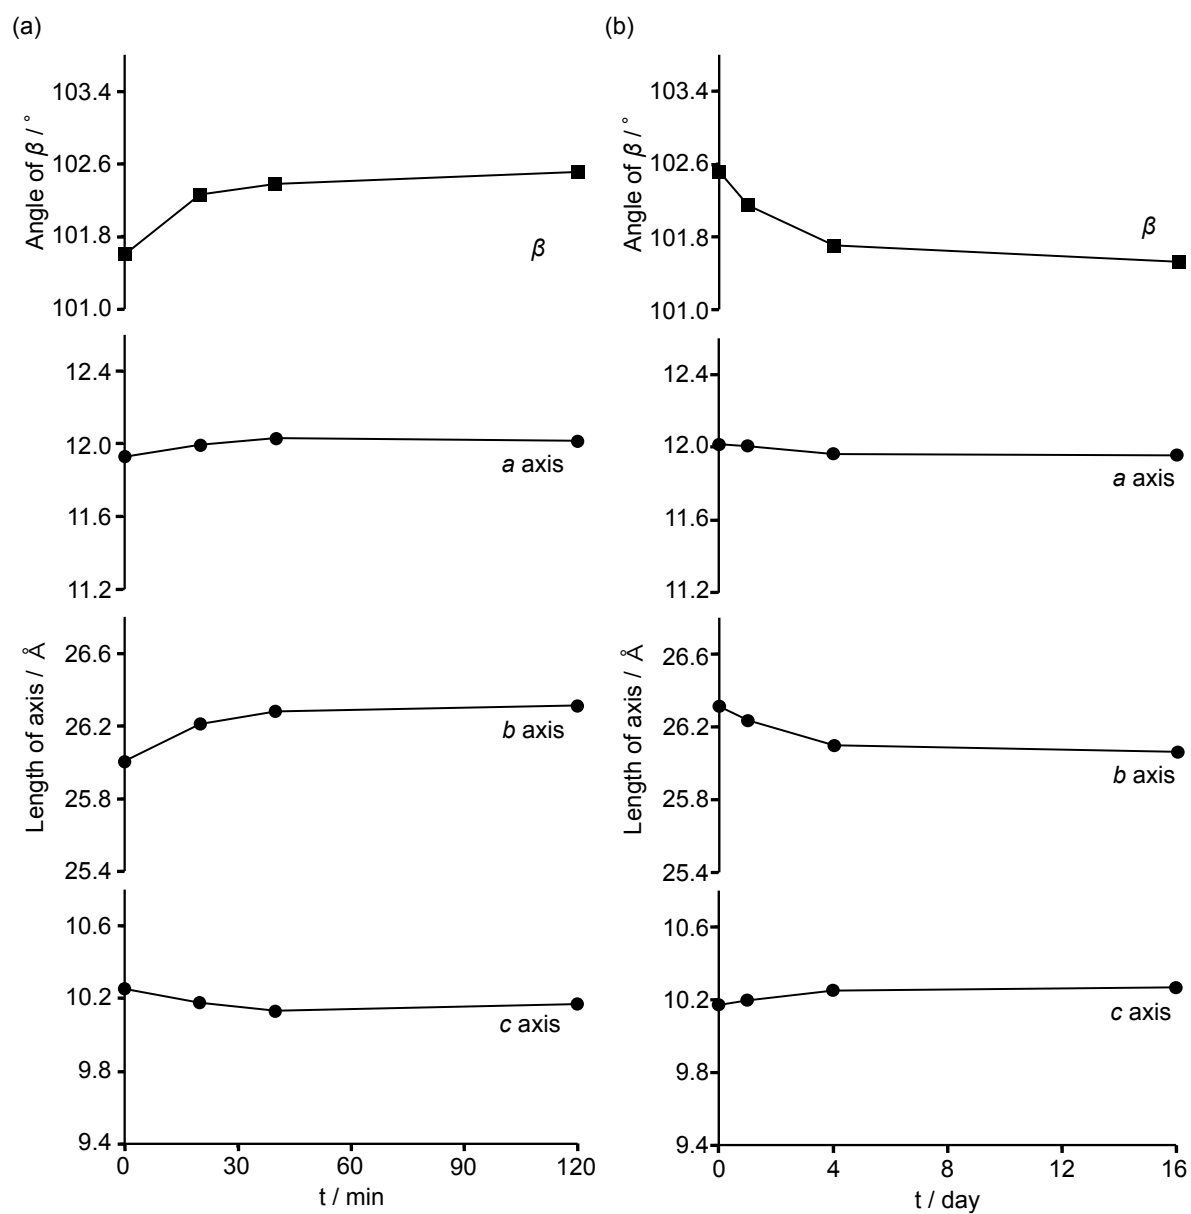

**Fig. S1** (a) Changes in the unit cell parameters ( $\beta$  angle and *a*, *b*, and *c* axes) with (a) irradiation (samples 1–4, 0 min data: sample 1) and (b) heating time (samples 4–7, 0 day data: sample 4). X-ray diffraction data were recorded at 23 °C. Crystal size: 0.25 x 0.10 x 0.05 mm<sup>3</sup>.

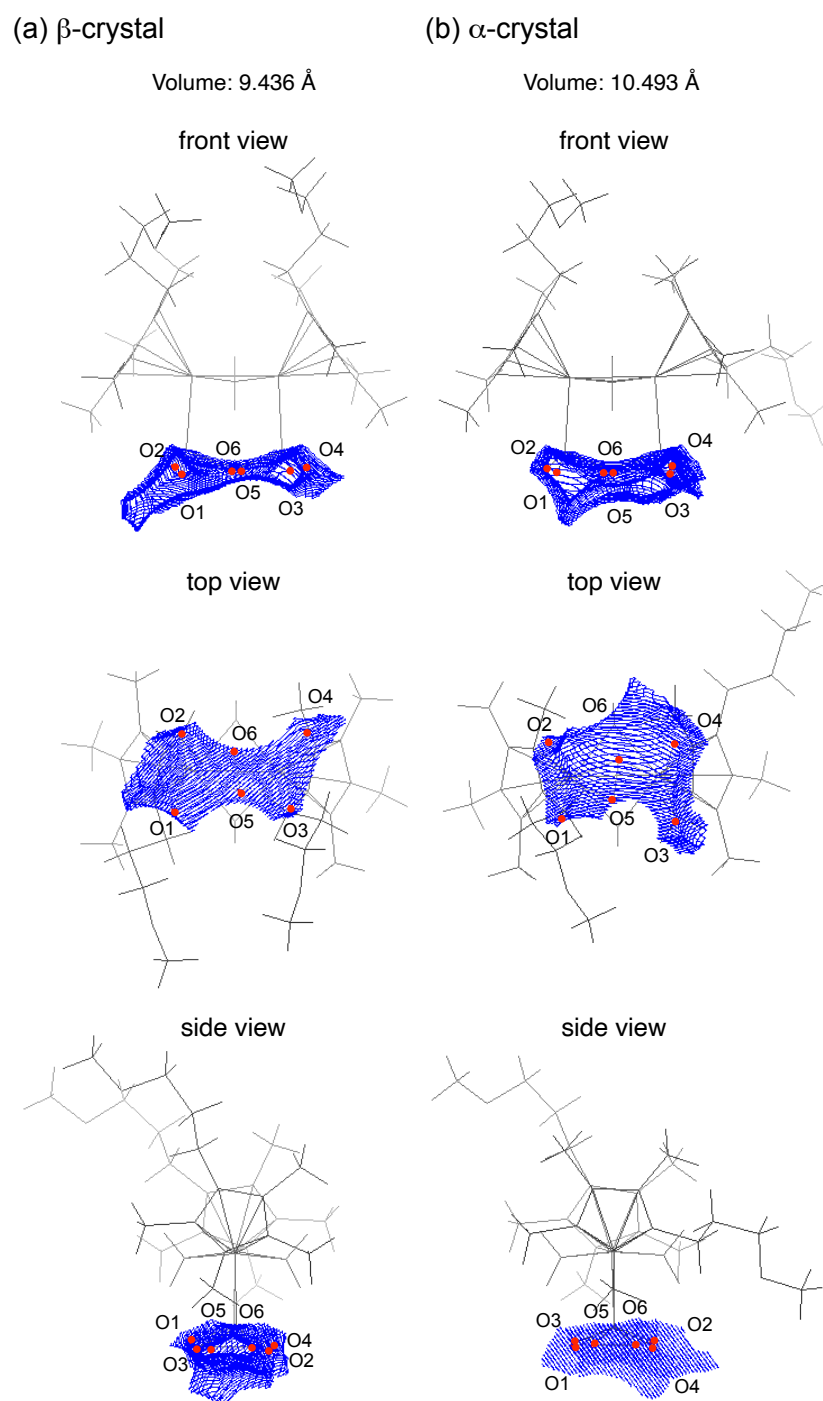

**Fig. S2** Cavities (front, top and side views) in sample 4 ( $2^{\text{MPro}}$ ) of the (a)  $\beta$ - and (b)  $\alpha$ -crystals. The contours are drawn in sections separated by 0.10 Å.

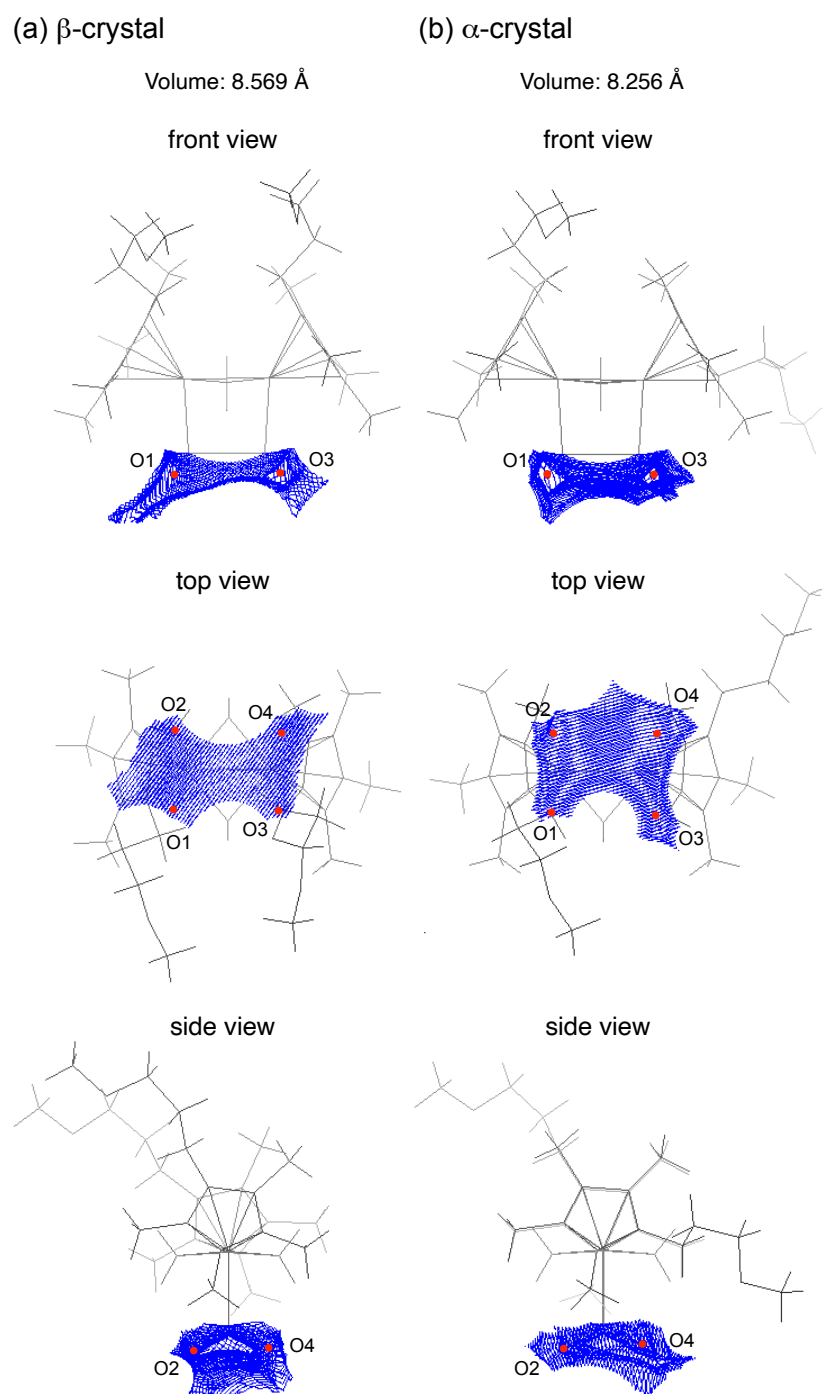

**Fig. S3** Cavities (front, top and side views) in sample 1 ( $1^{MPro}$ ) of the (a)  $\beta$ - and (b)  $\alpha$ -crystals. The contours are drawn in sections separated by 0.10 Å.

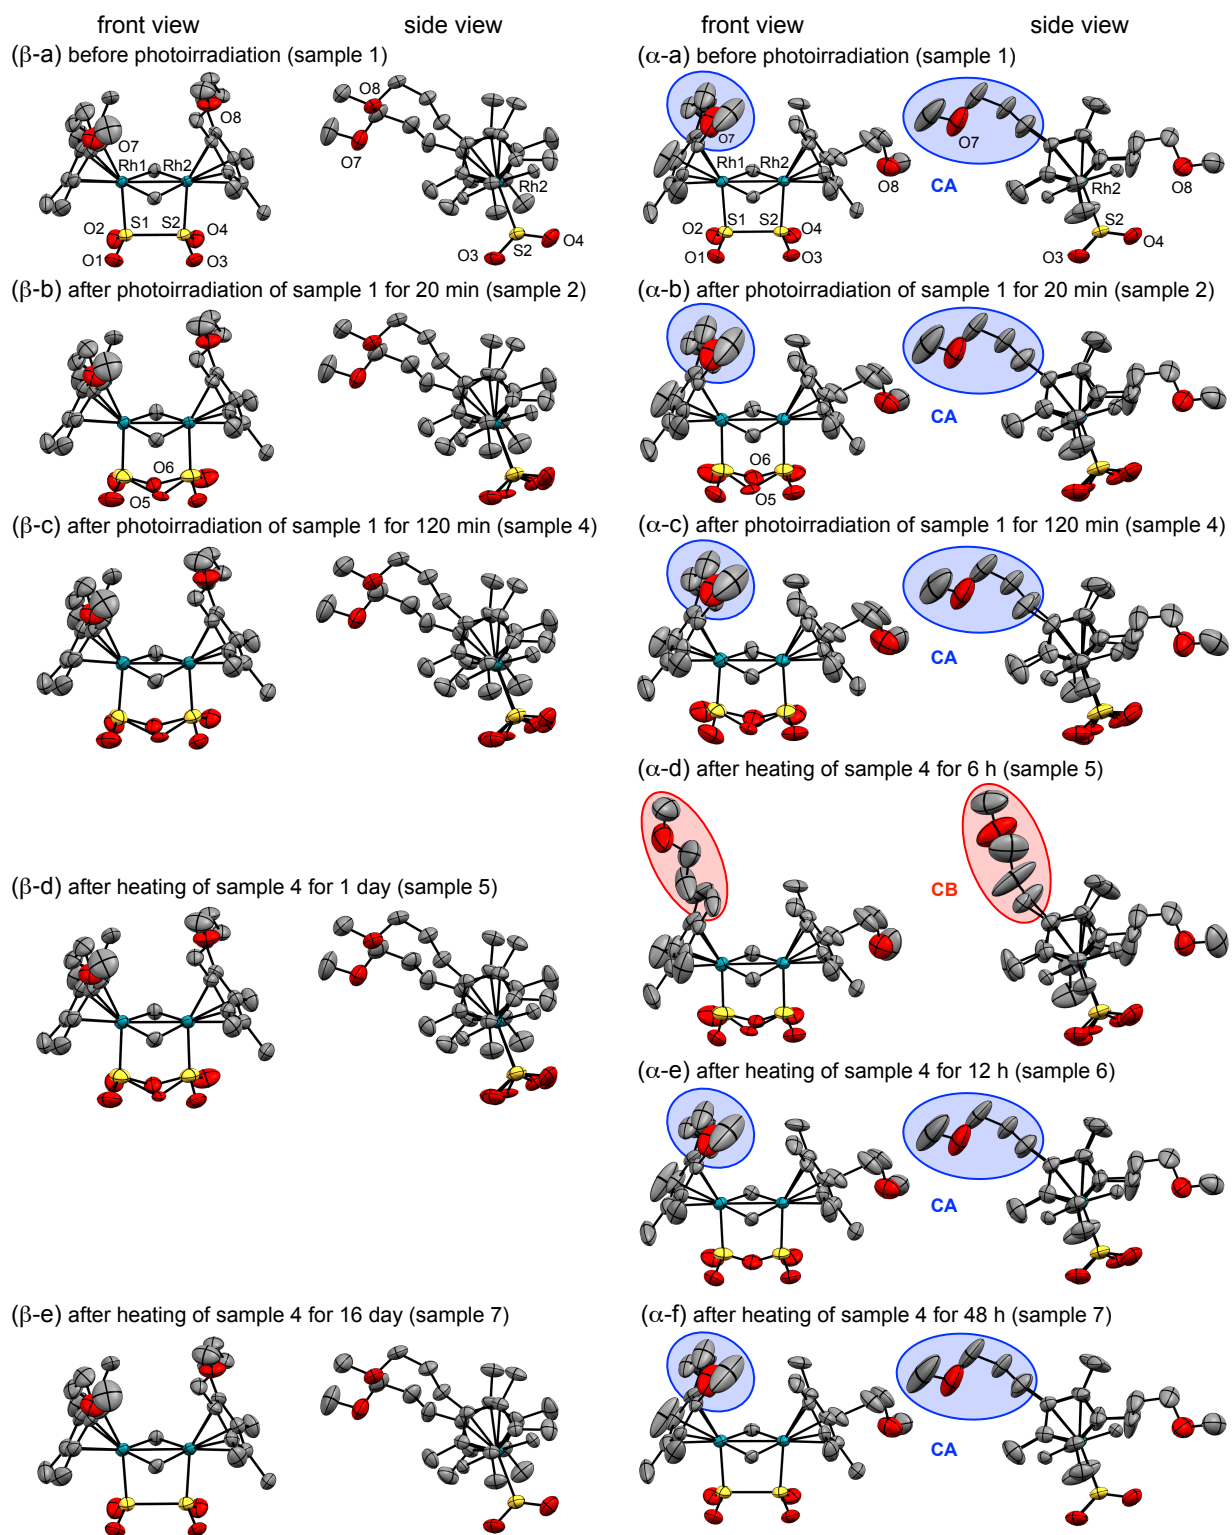

**Fig. S4** ORTEP drawings of  $1^{\text{MPro}}$  (50% probability ellipsoids, front and side views) in samples of ( $\beta$ -a–e) the  $\beta$ -crystal and ( $\alpha$ -a–f)  $\alpha$ -crystal. The hydrogen atoms are omitted for clarity. Data of  $\alpha$ -crystal: *Dalton Trans.*, 2022, **51**, 48.
